# Supplementary material for: Development of a 7-miRNA prognostic signature for patients with bladder cancer
Source: Aging (Albany NY). 2022 Dec 21;14(24):10093–106. doi: 10.18632/aging.204447 (PMC9831742; doi:10.18632/aging.204447)
Supplement: Supplementary Table 1 [file aging-14-204447-s001.xlsx]

## Sheet: Sheet1
Supplementary Table 1. Downregulated miRNAs.
id	logFC	logCPM	PValue	FDR
hsa-miR-1298-3p	-5.10478	-0.591525	3.11e-37	4.44e-35
hsa-miR-490-5p	-4.24027	0.370249	3.35e-22	2.04e-20
hsa-miR-133b	-4.02669	3.55649	3.42e-30	2.66e-28
hsa-miR-1-3p	-3.89928	6.56654	2.1e-40	3.6e-38
hsa-miR-143-3p	-3.71089	17.9748	8.49e-52	3.63e-49
hsa-miR-133a-3p	-3.6569	5.90567	5.09e-35	6.22e-33
hsa-miR-139-3p	-3.58811	4.08292	4.89e-71	4.18e-68
hsa-miR-548ba	-3.22064	-0.614958	3.79e-16	1.08e-14
hsa-miR-1247-3p	-3.03439	5.62335	5.29e-18	2.06e-16
hsa-miR-30a-3p	-2.88188	11.6249	4.67e-48	1.33e-45
hsa-miR-1258	-2.8798	-0.241524	2.27e-14	5.12e-13
hsa-miR-504-5p	-2.87097	0.20548	1.35e-22	8.9e-21
hsa-miR-383-5p	-2.82094	2.07525	2.47e-09	2.32e-08
hsa-miR-145-3p	-2.81032	6.22728	2.62e-33	2.8e-31
hsa-miR-6507-5p	-2.7477	-0.0199348	5.93e-12	8.05e-11
hsa-miR-133a-5p	-2.6616	-0.246902	5.82e-13	9.05e-12
hsa-miR-195-5p	-2.63601	4.91015	9.86e-44	2.11e-41
hsa-miR-490-3p	-2.60278	4.06837	2.7e-08	1.97e-07
hsa-let-7c-5p	-2.48228	10.187	6.34e-19	2.86e-17
hsa-miR-30c-2-3p	-2.43114	4.92649	6e-32	5.7e-30
hsa-miR-139-5p	-2.33831	5.77732	2.78e-30	2.38e-28
hsa-miR-4786-5p	-2.28713	0.0666859	3.44e-17	1.23e-15
hsa-miR-3199	-2.27231	0.495191	2.89e-20	1.55e-18
hsa-miR-145-5p	-2.26829	11.7199	3.19e-19	1.6e-17
hsa-miR-221-5p	-2.25945	2.23005	5.9e-11	7.42e-10
hsa-miR-6761-5p	-2.206	-0.292617	2.05e-12	2.87e-11
hsa-miR-99a-5p	-2.18525	8.23758	1.95e-13	3.54e-12
hsa-miR-5683	-2.05663	2.16718	8.88e-07	4.52e-06
hsa-miR-100-5p	-1.9917	11.8562	4.68e-15	1.11e-13
hsa-miR-23c	-1.97643	-0.598747	6.1e-05	0.000185472
hsa-miR-4536-3p	-1.8437	-0.68799	1.65e-09	1.61e-08
hsa-miR-585-5p	-1.8399	-0.386958	1.78e-07	1.1e-06
hsa-miR-125b-5p	-1.78659	8.8977	1.02e-13	2.07e-12
hsa-miR-125b-2-3p	-1.78648	3.60097	1.07e-06	5.33e-06
hsa-miR-218-1-3p	-1.7825	-0.2505	6.94e-09	5.81e-08
hsa-miR-1911-5p	-1.77744	1.92323	0.00277348	0.00541398
hsa-miR-4732-3p	-1.77341	-0.632134	2e-05	7e-05
hsa-miR-30a-5p	-1.73316	13.3639	1.26e-16	4.14e-15
hsa-miR-3926	-1.69328	-0.56513	6.59e-07	3.48e-06
hsa-miR-887-5p	-1.68964	-0.541649	1.09e-07	7.19e-07
hsa-miR-195-3p	-1.6851	1.44289	3.61e-13	5.94e-12
hsa-miR-204-5p	-1.66931	3.36908	0.000162823	0.00042835
hsa-miR-6892-5p	-1.62393	1.1697	2.3e-13	4.01e-12
hsa-miR-99a-3p	-1.59524	0.853852	9.21e-06	3.53e-05
hsa-miR-28-3p	-1.58611	12.306	3.22e-29	2.29e-27
hsa-miR-202-5p	-1.57873	-0.0269443	4.44e-05	0.00014045
hsa-miR-7156-5p	-1.5203	0.0957915	3.26e-06	1.42e-05
hsa-miR-338-5p	-1.50782	2.02082	6.83e-10	7.3e-09
hsa-miR-1247-5p	-1.48903	3.91654	0.000122261	0.000339393
hsa-miR-5698	-1.42555	-0.0546348	3.69e-05	0.000119413
hsa-miR-369-5p	-1.42018	2.73834	1.62e-06	7.53e-06
hsa-miR-370-5p	-1.41179	2.06575	2.06e-08	1.53e-07
hsa-miR-378d	-1.3998	0.305054	4.6e-06	1.93e-05
hsa-miR-485-5p	-1.39564	-0.502105	6.53e-05	0.000197387
hsa-miR-125b-1-3p	-1.39433	0.351251	8.45e-06	3.3e-05
hsa-miR-758-5p	-1.39208	3.47381	8.87e-06	3.43e-05
hsa-miR-218-5p	-1.39104	5.57302	3.05e-09	2.78e-08
hsa-miR-127-3p	-1.38909	9.45476	1.05e-08	8.46e-08
hsa-let-7c-3p	-1.38689	2.67141	6.52e-05	0.000197387
hsa-miR-30e-3p	-1.36412	12.4511	1.92e-20	1.1e-18
hsa-miR-379-5p	-1.35244	9.83329	5.03e-08	3.52e-07
hsa-miR-23b-3p	-1.34224	10.3792	2.98e-16	9.11e-15
hsa-miR-378c	-1.33458	3.41894	3.24e-09	2.88e-08
hsa-miR-1262	-1.33315	0.461892	6.82e-07	3.56e-06
hsa-miR-337-3p	-1.29826	5.09754	9.93e-08	6.58e-07
hsa-miR-378a-3p	-1.29513	10.0628	4.14e-08	2.98e-07
hsa-miR-665	-1.2883	-0.68225	0.00234126	0.00465529
hsa-miR-365a-3p	-1.28405	6.38859	2.02e-12	2.87e-11
hsa-miR-365b-3p	-1.28385	6.3887	2.03e-12	2.87e-11
hsa-miR-654-3p	-1.27381	5.28999	2.74e-05	9.08e-05
hsa-miR-411-5p	-1.2722	3.22577	1.13e-06	5.5e-06
hsa-miR-605-5p	-1.26839	-0.404172	0.00501421	0.0091999
hsa-miR-27a-5p	-1.25331	4.3824	1.12e-06	5.5e-06
hsa-miR-29a-3p	-1.24834	12.7254	1.72e-09	1.63e-08
hsa-miR-100-3p	-1.20556	-0.360316	0.00341877	0.00653414
hsa-miR-374b-5p	-1.18772	6.28096	6.3e-16	1.68e-14
hsa-miR-377-5p	-1.16825	2.23693	0.00117508	0.00251173
hsa-miR-379-3p	-1.14681	0.57654	0.00234858	0.00465903
hsa-miR-10b-5p	-1.13918	15.2112	4.78e-07	2.61e-06
hsa-miR-495-3p	-1.11969	3.35619	4.35e-06	1.85e-05
hsa-miR-132-5p	-1.10568	1.42556	2.86e-07	1.64e-06
hsa-miR-26a-5p	-1.10385	10.8998	6.07e-16	1.67e-14
hsa-miR-299-5p	-1.0785	2.12452	5.13e-05	0.00015999
hsa-miR-486-5p	-1.06814	7.08008	0.000447406	0.00105672
hsa-miR-143-5p	-1.06477	6.15374	4.45e-06	1.89e-05
hsa-miR-140-3p	-1.05756	9.84542	8.77e-13	1.34e-11
hsa-miR-28-5p	-1.04745	6.9944	3.4e-15	8.3e-14
hsa-miR-381-3p	-1.03731	5.71915	1.09e-06	5.4e-06
hsa-miR-150-5p	-1.03628	9.19969	0.00107017	0.00232233
hsa-miR-654-5p	-1.02463	1.06657	0.000130093	0.000355366
hsa-miR-497-5p	-1.02179	3.86209	5.56e-07	2.97e-06
hsa-miR-340-5p	-1.00837	3.88865	1.64e-07	1.03e-06
hsa-miR-5091	-1.00586	-0.544516	0.00946786	0.0163206
hsa-miR-152-3p	-1.00122	7.85768	1.43e-06	6.93e-06
Upregulated miRNAs
id	logFC	logCPM	PValue	FDR
hsa-miR-92a-3p	1.00796	13.7362	9.33e-08	6.27e-07
hsa-miR-671-3p	1.01132	1.76267	0.000126833	0.000348687
hsa-miR-629-5p	1.01378	6.67772	2.84e-06	1.28e-05
hsa-miR-1288-3p	1.01584	-0.0791434	0.00677729	0.0121225
hsa-miR-181a-3p	1.02476	7.47739	8.94e-06	3.44e-05
hsa-miR-627-5p	1.03294	0.927802	7.36e-05	0.000218397
hsa-miR-6516-3p	1.03481	-0.594746	0.0217697	0.0335977
hsa-miR-1343-3p	1.03505	0.254383	0.0150738	0.0245488
hsa-miR-21-3p	1.04151	11.424	4.11e-05	0.000131707
hsa-miR-4662a-5p	1.07013	5.04819	0.000924745	0.00203056
hsa-miR-3928-3p	1.07103	0.827174	0.000428441	0.00102323
hsa-miR-652-3p	1.07212	4.85419	2.6e-06	1.18e-05
hsa-let-7f-2-3p	1.07604	0.335093	0.000439197	0.00104309
hsa-miR-942-3p	1.07756	0.256831	0.00171889	0.00354099
hsa-miR-335-5p	1.07804	3.57475	0.0039524	0.00741075
hsa-miR-4661-5p	1.07892	2.45317	0.00133971	0.0028213
hsa-miR-4645-3p	1.07944	-0.631534	0.0164104	0.026275
hsa-miR-580-3p	1.07967	0.0381887	0.00521889	0.0095345
hsa-miR-3940-5p	1.08559	-0.0832176	0.0186664	0.0293379
hsa-miR-548j-5p	1.08931	-0.0660717	0.00125256	0.00265742
hsa-miR-4742-3p	1.09471	0.292692	0.0029517	0.00570973
hsa-miR-194-5p	1.09535	7.67702	0.000282739	0.000704031
hsa-miR-32-5p	1.09595	5.2924	7.96e-07	4.07e-06
hsa-miR-1284	1.10582	-0.41176	0.0161043	0.0259029
hsa-miR-653-3p	1.10687	-0.431573	0.0179643	0.0283745
hsa-miR-450a-5p	1.10714	3.52711	8.54e-06	3.32e-05
hsa-miR-452-5p	1.11018	7.59534	0.0078048	0.0138159
hsa-miR-194-3p	1.11298	1.25985	0.00461629	0.00856166
hsa-miR-3615	1.11315	2.79943	7.8e-07	4.02e-06
hsa-miR-1292-5p	1.11563	0.0810364	0.00313015	0.00602766
hsa-miR-548o-3p	1.11595	0.151214	0.000982099	0.00214208
hsa-miR-576-5p	1.12163	3.63415	1.55e-07	9.82e-07
hsa-miR-4326	1.13905	3.06589	0.00476118	0.00879224
hsa-miR-6501-5p	1.14112	-0.367497	0.0114666	0.0194137
hsa-miR-1180-3p	1.1522	4.44388	0.000172585	0.000451255
hsa-miR-324-3p	1.15377	4.89298	1.64e-05	5.86e-05
hsa-miR-224-3p	1.15727	2.65536	0.0158683	0.0255988
hsa-miR-1304-5p	1.15982	-0.119008	0.00794612	0.014037
hsa-miR-331-3p	1.1615	4.5583	1.62e-06	7.53e-06
hsa-miR-942-5p	1.16641	3.0754	2.71e-06	1.23e-05
hsa-miR-1228-5p	1.16839	-0.191251	0.00248239	0.00490172
hsa-miR-4726-5p	1.16886	-0.556493	0.0166281	0.02652
hsa-miR-632	1.17216	-0.484671	0.00825547	0.0143901
hsa-miR-581	1.17491	-0.415395	0.0213823	0.0330594
hsa-miR-15a-5p	1.17602	7.72239	6.85e-08	4.68e-07
hsa-miR-17-3p	1.18246	8.81541	1.44e-08	1.12e-07
hsa-miR-454-5p	1.18469	0.476322	0.000121903	0.000339393
hsa-miR-16-2-3p	1.19769	3.47264	8.47e-09	6.9e-08
hsa-miR-15b-3p	1.20375	5.18572	6.6e-09	5.64e-08
hsa-miR-548s	1.2062	-0.695524	0.019744	0.0307489
hsa-miR-550a-5p	1.2105	1.86639	5.81e-05	0.000178453
hsa-miR-769-3p	1.21412	1.63215	1.64e-05	5.86e-05
hsa-miR-323a-3p	1.21723	2.7795	0.0173647	0.0275963
hsa-miR-148b-5p	1.2179	1.60161	3.85e-07	2.14e-06
hsa-miR-181c-3p	1.23576	5.85262	3.92e-05	0.000125935
hsa-miR-1226-3p	1.24479	1.39453	0.0011288	0.00242493
hsa-miR-185-5p	1.24872	6.50161	6.06e-12	8.09e-11
hsa-miR-3691-5p	1.25682	-0.258206	0.0319271	0.0478906
hsa-miR-6854-5p	1.26192	1.25945	2.37e-05	8.08e-05
hsa-miR-185-3p	1.26878	2.73904	2.71e-05	9.01e-05
hsa-miR-6820-3p	1.26899	-0.355606	0.00353354	0.00669885
hsa-miR-548v	1.27457	0.261323	0.00173893	0.00356544
hsa-miR-3913-3p	1.27764	-0.415944	0.0243405	0.0370965
hsa-miR-33b-3p	1.28323	-0.179015	0.0320712	0.0480226
hsa-miR-760	1.28519	1.15742	0.00588061	0.010675
hsa-miR-151a-5p	1.29613	6.89062	6.67e-09	5.64e-08
hsa-miR-4668-3p	1.29827	1.33172	1.08e-05	4.06e-05
hsa-miR-181b-5p	1.30204	8.45991	1.72e-07	1.07e-06
hsa-miR-9-5p	1.30516	10.8147	0.013867	0.0228445
hsa-miR-3934-5p	1.30695	0.699598	0.00144972	0.00303058
hsa-miR-196a-5p	1.30703	5.80514	0.0115444	0.0195046
hsa-miR-219b-3p	1.3116	-0.156472	0.00121768	0.00258985
hsa-miR-5684	1.31413	0.307649	0.00415408	0.00773799
hsa-miR-365b-5p	1.31443	-0.297487	0.00595599	0.0107889
hsa-miR-616-3p	1.31634	0.0851301	0.00251387	0.00494106
hsa-miR-425-3p	1.32029	3.94967	2.74e-07	1.59e-06
hsa-miR-191-5p	1.32888	9.66902	3.99e-08	2.89e-07
hsa-miR-4473	1.33715	-0.389741	0.029388	0.0443153
hsa-miR-7706	1.33966	1.74988	0.000284893	0.000706039
hsa-miR-550a-3p	1.34115	1.29808	5.4e-06	2.2e-05
hsa-miR-187-3p	1.34642	6.9947	0.0121308	0.0202575
hsa-miR-19b-3p	1.3634	7.57993	1.35e-10	1.59e-09
hsa-miR-454-3p	1.36998	3.29466	3.09e-09	2.78e-08
hsa-miR-3922-3p	1.38504	0.371924	0.000320749	0.000783543
hsa-miR-4797-3p	1.38598	-0.251679	0.00890557	0.0154448
hsa-miR-142-3p	1.38638	10.3868	0.000116135	0.000325558
hsa-miR-590-3p	1.39254	2.63969	1.92e-10	2.16e-09
hsa-miR-639	1.39598	-0.116337	0.00157383	0.00326607
hsa-miR-4777-3p	1.40146	-0.51563	0.0047441	0.00877967
hsa-miR-584-3p	1.40331	0.13411	0.00279827	0.00544993
hsa-miR-4728-3p	1.41082	1.76864	0.00506657	0.00927605
hsa-miR-652-5p	1.41584	0.0690535	0.000134791	0.000365861
hsa-miR-193b-3p	1.41589	7.24576	1.47e-06	7.06e-06
hsa-miR-19b-1-5p	1.42406	3.31558	1.69e-08	1.3e-07
hsa-miR-556-5p	1.42444	-0.403489	0.0241781	0.0369148
hsa-miR-106b-5p	1.43499	8.69949	6.74e-12	8.86e-11
hsa-miR-939-5p	1.43672	0.53618	2.12e-05	7.4e-05
hsa-miR-203a-3p	1.45156	14.9746	0.0121671	0.0202784
hsa-miR-548au-3p	1.46817	-0.530923	0.00207635	0.00418697
hsa-miR-423-3p	1.47744	7.03969	2.1e-13	3.74e-12
hsa-miR-5001-5p	1.47889	-0.262837	0.000125957	0.000347398
hsa-miR-1291	1.4793	-0.250414	0.000725935	0.00162907
hsa-miR-548k	1.48458	-0.67061	0.00342374	0.00653414
hsa-miR-5706	1.48553	-0.589308	0.000964136	0.00210828
hsa-miR-92a-1-5p	1.4917	2.06732	1.5e-06	7.19e-06
hsa-miR-10a-3p	1.50521	1.87671	0.00211806	0.00426105
hsa-miR-1295a	1.50572	0.0648977	0.0240803	0.0368313
hsa-miR-18b-5p	1.51476	0.320787	0.00111075	0.00239821
hsa-miR-877-3p	1.51587	-0.307653	0.00219311	0.0043998
hsa-miR-7-5p	1.51797	2.05718	0.00232669	0.00463711
hsa-miR-3662	1.51996	-0.0277902	0.00219733	0.0043998
hsa-miR-653-5p	1.52129	2.92429	0.000399949	0.000963258
hsa-miR-551a	1.52343	-0.472427	0.00999377	0.0170552
hsa-miR-16-1-3p	1.53524	2.63508	5.31e-09	4.58e-08
hsa-miR-1287-3p	1.54038	2.66768	3.75e-05	0.000120984
hsa-miR-643	1.54303	-0.282212	0.000277788	0.00069447
hsa-miR-431-5p	1.54591	2.55544	0.0125584	0.0208089
hsa-miR-3613-5p	1.55047	3.76782	2.45e-10	2.66e-09
hsa-miR-34b-3p	1.57004	1.027	0.00126181	0.00267043
hsa-miR-32-3p	1.57851	0.917298	6.78e-07	3.56e-06
hsa-miR-1301-5p	1.58129	-0.435696	0.00292628	0.0056734
hsa-miR-200c-3p	1.592	13.9858	7.23e-06	2.89e-05
hsa-miR-188-3p	1.60329	0.341494	0.000235102	0.000600037
hsa-miR-106a-5p	1.6035	4.12949	7.4e-06	2.94e-05
hsa-miR-3074-5p	1.60441	2.5915	7.69e-05	0.000226057
hsa-miR-642a-5p	1.61098	1.15069	0.000155058	0.000413006
hsa-miR-3913-5p	1.61736	2.73279	2.25e-05	7.72e-05
hsa-miR-2277-5p	1.61974	0.0725137	0.000451081	0.00106246
hsa-miR-4766-3p	1.6241	-0.367142	0.00398241	0.00743441
hsa-miR-6891-5p	1.62581	-0.575652	0.020451	0.0317343
hsa-miR-188-5p	1.62771	1.88811	5.36e-07	2.88e-06
hsa-miR-21-5p	1.63241	18.1984	3.43e-13	5.75e-12
hsa-miR-651-5p	1.63529	2.14199	4.69e-09	4.09e-08
hsa-miR-6499-5p	1.6406	1.20622	0.0232829	0.0357395
hsa-miR-1301-3p	1.648	3.54459	3.72e-09	3.27e-08
hsa-miR-6781-3p	1.65183	-0.497843	0.00171071	0.00353299
hsa-miR-3614-5p	1.66359	2.74766	0.000325702	0.000793376
hsa-miR-1307-3p	1.6644	10.7235	4.53e-13	7.17e-12
hsa-miR-219a-5p	1.67551	1.0024	5.82e-05	0.000178453
hsa-miR-34c-5p	1.67597	3.32429	8.79e-05	0.000252695
hsa-miR-3187-3p	1.67644	-0.280296	0.0140381	0.0230818
hsa-miR-4746-5p	1.69827	2.40521	2.39e-07	1.43e-06
hsa-miR-3614-3p	1.69918	1.26887	7.09e-05	0.000211307
hsa-miR-1276	1.70142	-0.621272	0.00656344	0.0117894
hsa-miR-3934-3p	1.70712	1.15975	1.15e-07	7.45e-07
hsa-miR-508-3p	1.71416	4.37052	0.0187761	0.0294561
hsa-miR-6868-3p	1.71822	-0.198259	0.00388794	0.007322
hsa-miR-34c-3p	1.73383	2.53523	7.95e-05	0.000232799
hsa-miR-93-3p	1.73418	4.22773	1.12e-12	1.68e-11
hsa-miR-616-5p	1.73425	0.817168	4.99e-06	2.06e-05
hsa-miR-4787-3p	1.73744	0.494603	0.00206433	0.00417257
hsa-miR-1304-3p	1.74228	1.02679	0.018962	0.0296389
hsa-miR-339-5p	1.74463	5.86964	1.67e-07	1.04e-06
hsa-miR-579-5p	1.75716	-0.151158	0.000478936	0.00112189
hsa-miR-5699-3p	1.76081	-0.129805	0.000644513	0.0014617
hsa-miR-3065-3p	1.77024	5.48867	2.63e-05	8.85e-05
hsa-miR-324-5p	1.77028	5.18281	1.41e-10	1.63e-09
hsa-miR-6797-3p	1.77757	-0.709133	0.00995576	0.0170244
hsa-miR-590-5p	1.78557	4.11451	1.11e-15	2.88e-14
hsa-miR-589-3p	1.79858	1.52874	2.55e-07	1.51e-06
hsa-miR-570-3p	1.79913	0.232717	3.14e-05	0.000103176
hsa-miR-323b-3p	1.80227	1.9285	8.7e-05	0.000251294
hsa-miR-20b-5p	1.8067	5.12342	0.000252745	0.000637453
hsa-miR-1910-3p	1.81457	-0.590373	0.00606959	0.0109483
hsa-miR-200b-3p	1.82328	10.5464	6.48e-06	2.61e-05
hsa-miR-130a-5p	1.82667	0.559227	2.18e-05	7.53e-05
hsa-miR-210-5p	1.82929	0.754201	3.16e-06	1.38e-05
hsa-miR-5579-3p	1.83594	-0.393511	0.00809738	0.014187
hsa-miR-744-3p	1.85626	3.91089	1.71e-08	1.3e-07
hsa-miR-935	1.85676	1.22384	0.0156352	0.0253183
hsa-miR-629-3p	1.87642	1.92132	1.66e-09	1.61e-08
hsa-miR-103a-2-5p	1.87661	1.62866	7.03e-09	5.83e-08
hsa-miR-708-3p	1.88453	6.61173	2.17e-07	1.31e-06
hsa-miR-25-5p	1.88496	-0.163053	0.000119361	0.000333509
hsa-miR-3170	1.898	0.643864	4.27e-06	1.83e-05
hsa-miR-6793-5p	1.90605	-0.575503	0.000390479	0.000945777
hsa-miR-503-3p	1.907	0.297972	8.65e-05	0.000250697
hsa-let-7g-3p	1.90842	4.68805	1.21e-13	2.4e-12
hsa-miR-200c-5p	1.91636	5.40076	1.25e-06	6.09e-06
hsa-miR-149-5p	1.9202	7.54471	3.69e-07	2.06e-06
hsa-miR-1270	1.93208	1.79059	0.00013353	0.000363593
hsa-miR-141-5p	1.93562	9.59465	4.85e-08	3.43e-07
hsa-miR-944	1.93722	6.26797	0.000153912	0.000411235
hsa-miR-3117-3p	1.95506	0.143396	0.000183955	0.000478059
hsa-miR-93-5p	1.95542	13.1447	3.04e-14	6.67e-13
hsa-miR-545-5p	1.97841	-0.423534	0.000129182	0.000354008
hsa-miR-192-5p	1.97948	8.81192	1.36e-08	1.08e-07
hsa-miR-6720-5p	1.98656	-0.669341	0.0087092	0.0151349
hsa-miR-3176	1.98898	-0.517382	0.00247498	0.00489841
hsa-miR-425-5p	1.98914	8.68653	1.53e-13	2.91e-12
hsa-miR-301a-3p	2.00616	3.9899	7.52e-11	9.32e-10
hsa-miR-4778-3p	2.01533	-0.12337	0.00348592	0.00663083
hsa-miR-200a-5p	2.0205	10.03	4.65e-07	2.55e-06
hsa-miR-4638-3p	2.02372	-0.188746	5.14e-06	2.11e-05
hsa-miR-20a-5p	2.03684	8.90071	1.83e-13	3.4e-12
hsa-miR-636	2.05818	-0.297401	4.98e-05	0.000155874
hsa-miR-584-5p	2.06346	8.48676	2.13e-07	1.29e-06
hsa-miR-6844	2.06347	-0.596523	0.00269835	0.00527937
hsa-miR-345-3p	2.0656	-0.258152	0.000156659	0.000415974
hsa-miR-4713-5p	2.07087	-0.624687	0.000633717	0.00144487
hsa-miR-452-3p	2.08633	3.39415	1.35e-05	4.92e-05
hsa-miR-1248	2.08699	-0.160889	0.000214335	0.000551977
hsa-miR-365a-5p	2.08756	0.815504	4.35e-07	2.4e-06
hsa-miR-181b-3p	2.10598	3.53244	1.63e-09	1.61e-08
hsa-miR-20a-3p	2.11313	3.36671	2.22e-10	2.44e-09
hsa-miR-548d-3p	2.14622	-0.446015	0.000237921	0.000605425
hsa-miR-200b-5p	2.14742	5.35878	7.45e-07	3.86e-06
hsa-miR-6777-5p	2.16133	-0.277323	0.00198904	0.00402993
hsa-miR-937-3p	2.16402	1.95423	1.11e-07	7.26e-07
hsa-miR-18a-3p	2.16999	1.58095	1.18e-09	1.2e-08
hsa-miR-17-5p	2.17468	9.39047	3.69e-16	1.08e-14
hsa-miR-19a-3p	2.1777	5.34275	2.19e-15	5.51e-14
hsa-miR-2277-3p	2.18211	-0.587777	0.000100717	0.000286091
hsa-miR-296-3p	2.18829	0.907677	0.000395667	0.000955637
hsa-miR-181b-2-3p	2.18973	1.05036	2.8e-07	1.62e-06
hsa-miR-130b-5p	2.19788	4.50156	8.65e-12	1.12e-10
hsa-miR-216a-5p	2.20487	1.33122	0.0226931	0.0348968
hsa-miR-31-3p	2.2053	5.62834	0.000226277	0.000579242
hsa-miR-205-5p	2.21034	13.2432	2.3e-06	1.06e-05
hsa-miR-455-3p	2.21827	7.40806	8.53e-10	9e-09
hsa-miR-3136-5p	2.22378	-0.0139939	3.13e-05	0.000103176
hsa-miR-4640-5p	2.23518	-0.659297	0.00081369	0.00181173
hsa-miR-4636	2.25111	1.26486	0.000138169	0.000372665
hsa-miR-3144-3p	2.26624	-0.34446	0.000846711	0.00188036
hsa-miR-1277-3p	2.26763	0.925908	2.6e-09	2.41e-08
hsa-miR-671-5p	2.29963	2.8592	1.05e-17	3.9e-16
hsa-miR-20b-3p	2.305	1.27556	0.000777273	0.00173971
hsa-miR-556-3p	2.30849	-0.272469	0.000272599	0.000685506
hsa-miR-217-5p	2.30901	6.62534	0.00283907	0.00551684
hsa-miR-449a	2.31222	0.518527	0.00128232	0.00270712
hsa-miR-1229-3p	2.31877	0.43056	4.21e-06	1.81e-05
hsa-miR-34b-5p	2.32874	0.531591	1.03e-05	3.92e-05
hsa-miR-708-5p	2.33466	5.66688	1.29e-09	1.3e-08
hsa-miR-203a-5p	2.3402	1.65505	0.000863389	0.00191243
hsa-miR-182-5p	2.3454	14.5592	1.57e-10	1.79e-09
hsa-miR-877-5p	2.34933	2.09033	1.96e-11	2.5e-10
hsa-miR-548x-3p	2.34935	-0.578316	0.0189197	0.0296271
hsa-miR-551b-3p	2.35903	2.91217	0.00044477	0.0010534
hsa-miR-186-3p	2.36599	-0.640961	1.9e-05	6.71e-05
hsa-miR-138-1-3p	2.37309	0.0486848	0.00188375	0.00383477
hsa-miR-3664-5p	2.39166	-0.604664	0.000673635	0.00151968
hsa-miR-137-3p	2.39957	1.29369	0.0115659	0.0195046
hsa-miR-4664-5p	2.41714	-0.3364	4.57e-05	0.000144321
hsa-miR-205-3p	2.42351	2.07311	2.59e-07	1.53e-06
hsa-miR-6814-3p	2.46455	-0.596038	0.000149342	0.000400275
hsa-miR-940	2.47134	2.79012	1.35e-10	1.59e-09
hsa-miR-130b-3p	2.49931	5.10948	2.89e-16	9.11e-15
hsa-miR-503-5p	2.5014	3.44753	8.22e-11	1e-09
hsa-miR-506-3p	2.51796	-0.215808	0.0261215	0.0396694
hsa-miR-509-3p	2.5433	2.91493	0.00170195	0.00352341
hsa-miR-4501	2.54756	0.696959	0.00939438	0.0162267
hsa-miR-155-3p	2.56302	-0.337581	0.000240972	0.000611367
hsa-miR-191-3p	2.57931	2.08428	1.7e-09	1.63e-08
hsa-miR-146a-3p	2.58667	-0.0215793	0.00826378	0.0143901
hsa-miR-548f-3p	2.59141	0.432501	0.00808769	0.014187
hsa-miR-4665-5p	2.59273	-0.512253	0.000476368	0.00111894
hsa-miR-3200-3p	2.5931	2.76321	6.33e-07	3.36e-06
hsa-miR-200a-3p	2.62162	9.28202	1.21e-08	9.67e-08
hsa-miR-1307-5p	2.63719	8.20612	1.03e-16	3.52e-15
hsa-miR-4728-5p	2.67128	-0.694927	0.00121556	0.00258985
hsa-miR-6783-3p	2.68151	-0.0879256	3.25e-07	1.84e-06
hsa-miR-1293	2.69625	0.216183	0.00183644	0.0037474
hsa-miR-4652-5p	2.7054	1.62012	1.72e-05	6.1e-05
hsa-miR-138-5p	2.74547	2.57719	1.3e-05	4.76e-05
hsa-miR-4449	2.7517	0.353946	2.59e-05	8.77e-05
hsa-miR-429	2.78329	8.43713	8.96e-10	9.34e-09
hsa-miR-3189-3p	2.7886	-0.0568148	0.000580772	0.00133484
hsa-miR-224-5p	2.7905	7.143	5.21e-07	2.82e-06
hsa-miR-335-3p	2.82597	7.34216	2.25e-08	1.66e-07
hsa-miR-6728-5p	2.82847	-0.579423	0.000514655	0.00119899
hsa-miR-3651	2.83177	1.19259	3.17e-07	1.81e-06
hsa-miR-105-3p	2.83323	-0.635674	0.00154672	0.00321762
hsa-miR-3944-3p	2.84606	0.192255	5.26e-06	2.15e-05
hsa-miR-18a-5p	2.84778	4.91945	5.7e-19	2.71e-17
hsa-miR-203b-3p	2.86237	5.94467	0.000243342	0.000615556
hsa-miR-345-5p	2.87195	4.69327	1.52e-12	2.25e-11
hsa-miR-149-3p	2.88467	0.43632	1.92e-07	1.17e-06
hsa-miR-6499-3p	2.89947	1.14624	0.000409094	0.000982516
hsa-miR-211-5p	2.92457	-0.572652	0.0162311	0.0260368
hsa-miR-4664-3p	2.93869	0.121151	4.66e-06	1.93e-05
hsa-miR-675-3p	2.9399	8.10705	0.000107094	0.000302196
hsa-miR-33a-5p	2.94091	4.76326	2.13e-14	4.93e-13
hsa-miR-183-5p	3.02729	13.7162	4.89e-14	1.02e-12
hsa-miR-3065-5p	3.05693	1.95502	1.72e-08	1.3e-07
hsa-miR-4446-3p	3.08384	-0.151581	1.16e-05	4.3e-05
hsa-miR-216b-5p	3.09133	1.11086	0.0311495	0.0468888
hsa-miR-33b-5p	3.1035	1.6542	1.2e-10	1.44e-09
hsa-miR-1910-5p	3.12003	0.624783	1.6e-06	7.53e-06
hsa-miR-216a-3p	3.13857	-0.317704	0.0209136	0.0323933
hsa-miR-141-3p	3.14588	10.6512	3.2e-13	5.47e-12
hsa-miR-31-5p	3.1888	6.32429	1.08e-06	5.35e-06
hsa-miR-7974	3.2212	-0.237348	1.2e-05	4.41e-05
hsa-miR-520f-5p	3.2422	-0.685705	0.0291127	0.0439777
hsa-miR-615-3p	3.26623	1.21625	1.39e-05	4.99e-05
hsa-miR-4756-3p	3.2817	-0.675274	0.0011484	0.00246086
hsa-miR-301a-5p	3.29623	2.79653	4.47e-14	9.56e-13
hsa-miR-489-3p	3.30872	-0.669489	0.00029771	0.000731442
hsa-miR-135a-3p	3.33985	-0.63752	0.011737	0.0197154
hsa-miR-4724-5p	3.39669	1.2337	4.53e-08	3.23e-07
hsa-miR-215-5p	3.40054	4.19352	2.26e-05	7.72e-05
hsa-miR-7112-3p	3.45547	-0.604506	2.7e-05	9.01e-05
hsa-miR-577	3.45863	2.11771	0.000283259	0.000704031
hsa-miR-135b-3p	3.4636	0.175273	1.76e-06	8.13e-06
hsa-miR-7705	3.51425	1.68993	3.75e-13	6.05e-12
hsa-miR-371a-3p	3.58615	-0.233273	0.0150522	0.0245488
hsa-miR-135b-5p	3.59804	4.83754	2.92e-09	2.69e-08
hsa-miR-548y	3.64432	-0.520995	0.000633351	0.00144487
hsa-miR-4523	3.64798	-0.525132	2.26e-05	7.72e-05
hsa-miR-934	3.65719	4.84394	7.99e-08	5.42e-07
hsa-miR-301b-3p	3.65769	1.7844	5.04e-12	6.95e-11
hsa-miR-514b-5p	3.81254	-0.486323	0.00370594	0.00699466
hsa-miR-96-5p	3.81294	5.23449	1.27e-18	5.18e-17
hsa-miR-519d-5p	3.84256	-0.425609	0.0122416	0.0203629
hsa-miR-183-3p	3.8529	1.11473	1.5e-13	2.91e-12
hsa-miR-147b-3p	3.85319	0.625112	1.43e-07	9.22e-07
hsa-miR-3923	3.89738	0.984386	0.0323877	0.0484117
hsa-miR-518d-3p	3.90896	-0.392356	0.0117271	0.0197154
hsa-miR-1251-5p	3.95105	1.03828	0.000810492	0.00180932
hsa-miR-105-5p	3.97917	6.87486	5.48e-05	0.00016972
hsa-miR-767-3p	4.18348	1.31546	3.15e-05	0.000103217
hsa-miR-520g-5p	4.19375	-0.22619	0.00680254	0.0121423
hsa-miR-6715b-3p	4.22482	0.357023	0.000161338	0.000425754
hsa-miR-3131	4.31835	-0.185813	0.000926219	0.00203056
hsa-miR-483-3p	4.32483	5.57208	1.38e-05	4.99e-05
hsa-miR-371a-5p	4.49008	-0.110744	0.00758502	0.0134827
hsa-miR-301b-5p	4.51344	0.841596	2.04e-10	2.26e-09
hsa-miR-483-5p	4.54111	5.45666	1.14e-05	4.24e-05
hsa-miR-767-5p	4.61331	6.38542	1.19e-05	4.38e-05
hsa-miR-519e-3p	4.64599	0.0199979	0.00256501	0.00503001
hsa-miR-373-3p	4.73214	0.769179	0.00335746	0.00645085
hsa-miR-210-3p	4.98416	9.96803	6.94e-19	2.97e-17
hsa-miR-524-3p	5.20155	0.382	0.00103883	0.00226004
hsa-miR-519e-5p	5.70597	0.747735	0.00052134	0.00121126
hsa-miR-520e-3p	5.94118	1.83206	0.000351205	0.000853068
hsa-miR-521	5.94505	0.939934	1.03e-05	3.92e-05
hsa-miR-372-3p	6.06838	3.35011	5.44e-05	0.000169175
hsa-miR-520d-5p	6.21044	1.15598	0.000541242	0.00125071
hsa-miR-498-5p	6.23618	2.02606	0.000123822	0.000342614
hsa-miR-526b-3p	6.28459	1.21352	0.000136581	0.000369547
hsa-miR-512-5p	6.42077	2.72243	5.66e-05	0.000174661
hsa-miR-524-5p	6.67686	1.5489	9.08e-05	0.000258673
hsa-miR-1283	6.73793	2.0589	2.85e-06	1.28e-05
hsa-miR-515-5p	6.74615	2.84036	2.59e-05	8.77e-05
hsa-miR-520h	6.84856	2.76494	7.42e-05	0.000218798
hsa-miR-525-3p	6.92026	2.31423	6.75e-05	0.00020255
hsa-miR-523-3p	6.93587	2.24584	0.000173387	0.00045197
hsa-miR-515-3p	7.01156	3.07582	7.42e-05	0.000218798
hsa-miR-519b-3p	7.19982	2.0076	3.29e-05	0.000107223
hsa-miR-519d-3p	7.21479	3.60076	4.67e-05	0.000146926
hsa-miR-517c-3p	7.22794	2.03186	0.000159859	0.000423157
hsa-miR-517b-3p	7.26599	4.78769	8.02e-06	3.14e-05
hsa-miR-517a-3p	7.26613	4.78783	8.02e-06	3.14e-05
hsa-miR-516b-5p	7.39207	3.97874	1.19e-05	4.38e-05
hsa-miR-517-5p	7.44184	3.26965	9.04e-05	0.000258493
hsa-miR-519c-3p	7.44484	2.23003	1.94e-05	6.82e-05
hsa-miR-520d-3p	7.46477	3.09186	6.66e-05	0.000200489
hsa-miR-522-3p	7.50098	2.76496	2.65e-07	1.55e-06
hsa-miR-518c-3p	7.50804	3.57179	1.04e-05	3.92e-05
hsa-miR-520g-3p	7.5707	3.67719	1.39e-05	4.99e-05
hsa-miR-527	7.63243	3.2128	7.49e-06	2.97e-05
hsa-miR-518a-5p	7.68108	3.25912	7.11e-06	2.86e-05
hsa-miR-518f-3p	7.80131	2.55988	1.11e-05	4.18e-05
hsa-miR-518e-3p	7.81971	3.86743	4.38e-05	0.000139195
hsa-miR-516a-5p	7.82828	6.06152	1.43e-08	1.12e-07
hsa-miR-520a-3p	7.89869	5.12528	4.64e-06	1.93e-05
hsa-miR-526b-5p	7.98231	5.88058	3.31e-07	1.86e-06
hsa-miR-518b	8.05616	5.00218	1.05e-06	5.28e-06
hsa-miR-518a-3p	8.07334	3.61834	6.09e-05	0.000185472
hsa-miR-520a-5p	8.14774	3.93239	3.01e-06	1.34e-05
hsa-miR-1323	8.19382	3.40752	3.07e-06	1.36e-05
hsa-miR-518c-5p	8.20913	4.25185	3.72e-06	1.6e-05
hsa-miR-519a-3p	8.25427	3.50771	9.38e-08	6.27e-07
hsa-miR-512-3p	8.26711	5.7956	5.1e-08	3.55e-07
hsa-miR-525-5p	8.39756	4.50284	1.55e-06	7.35e-06
hsa-miR-520b-3p	8.55289	3.2661	3.39e-06	1.47e-05
hsa-miR-520c-3p	8.55402	3.2672	3.11e-06	1.37e-05
hsa-miR-520f-3p	8.63452	4.14432	1.62e-06	7.53e-06
hsa-miR-518f-5p	8.79564	4.35869	4.49e-06	1.89e-05
hsa-miR-519a-5p	9.38815	5.65731	1.05e-09	1.08e-08
